# Supplementary figures and images for: An interesting pseudo-honeycomb supramolecular arrangement obtained from the interaction between 4-aminosalicylic acid, trans-1,2-bis(4-pyridyl)ethylene and transition metal ions
Source: Royal Society of Chemistry journal article supplement (doi:10.1039/c2ce05771a), 2012-01-01

Figure S<sub>1</sub>

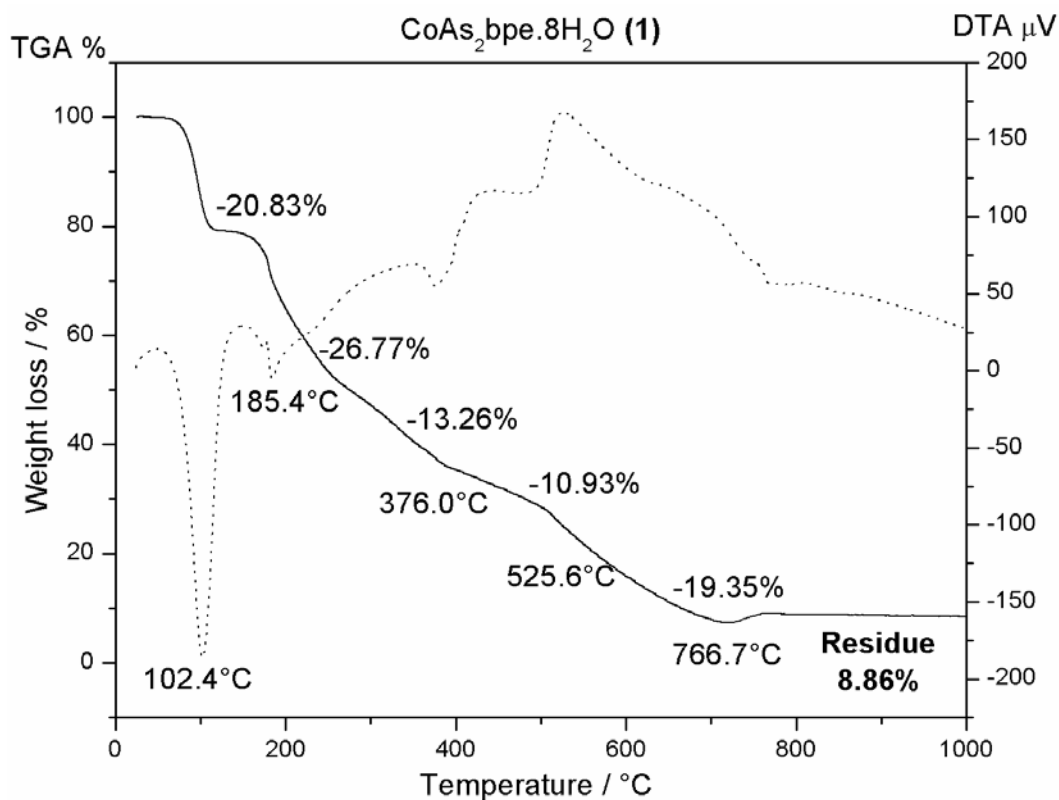

Figure S<sub>2</sub>

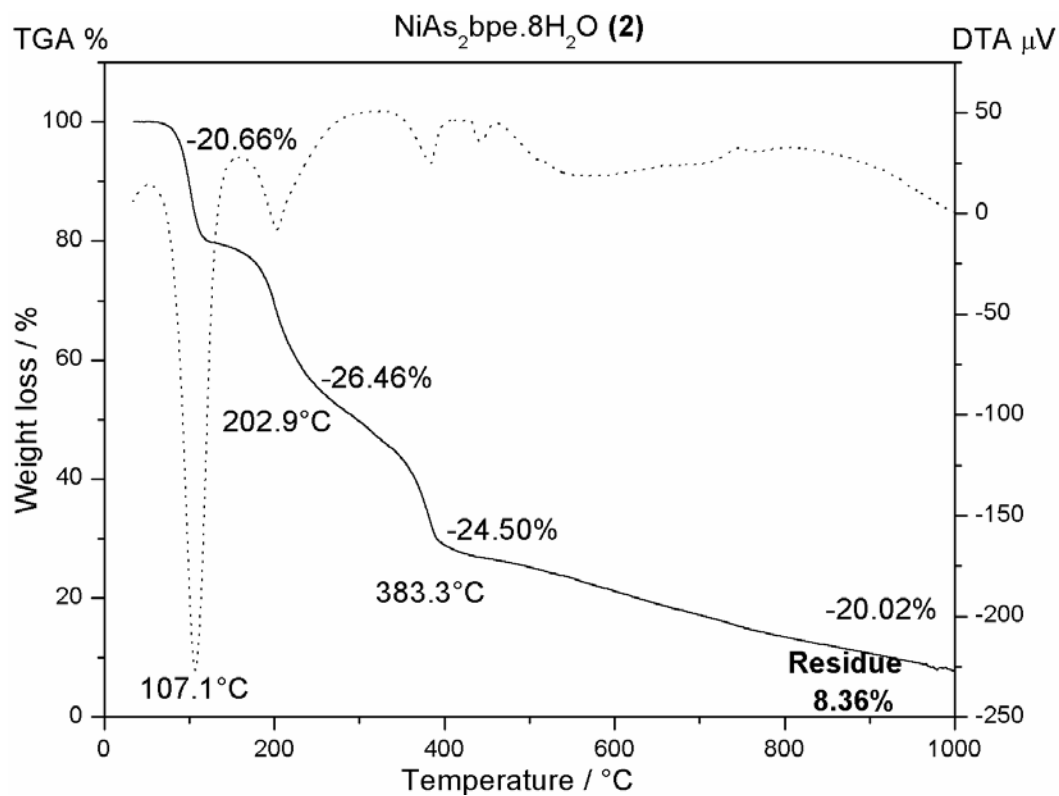

Figure S<sub>3</sub>

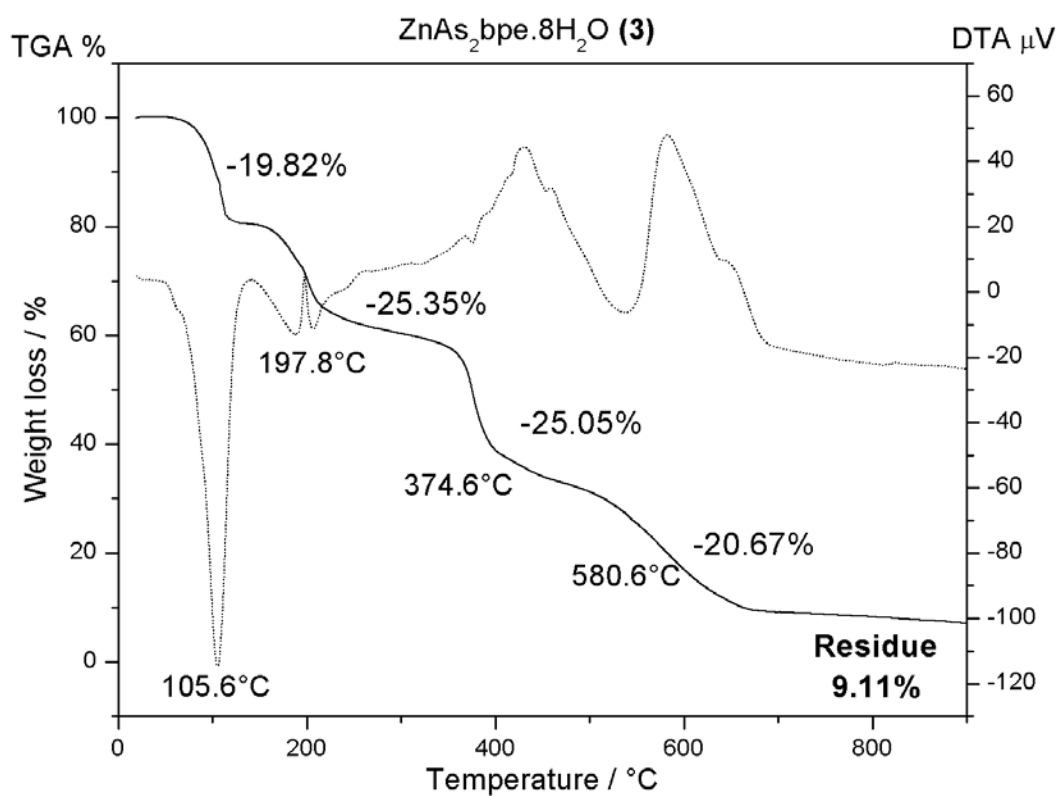

Figure S<sub>4</sub>

$$N_2 = R_4^2(34)$$

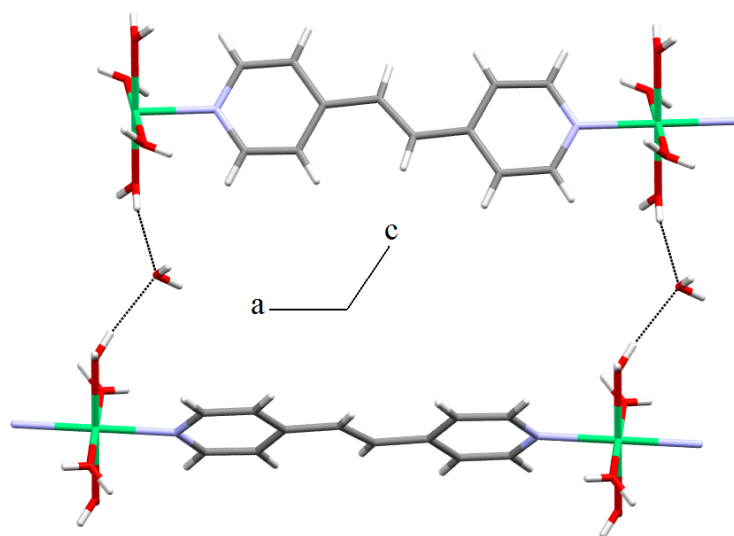

Figure S5

$$N_3 = C_4^3(16)R_4^3(27)$$

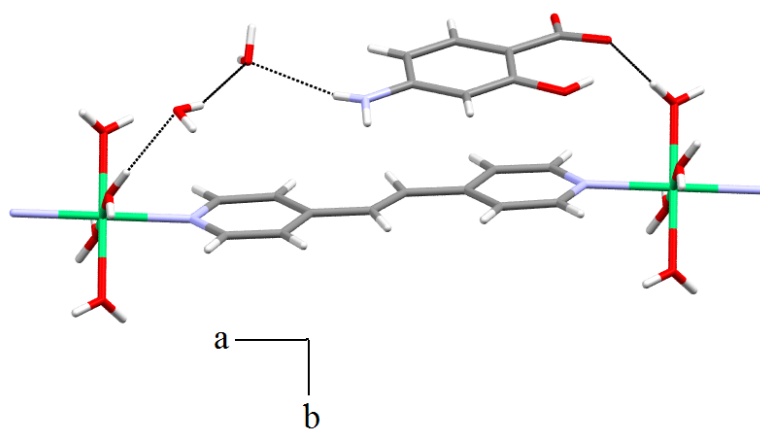

Supplement: c2ce05771a.pdf [file c2ce05771a.pdf]
